# Supplementary material for: Role of Mg ions in modulating the morphology and structure of CaCO3 crystals grown in aqueous foams
Source: Royal Society of Chemistry journal article supplement (doi:10.1039/b501420b), 2005-01-01
Supplement: b501420b.pdf [file b501420b.pdf]

Supporting Information (S1):

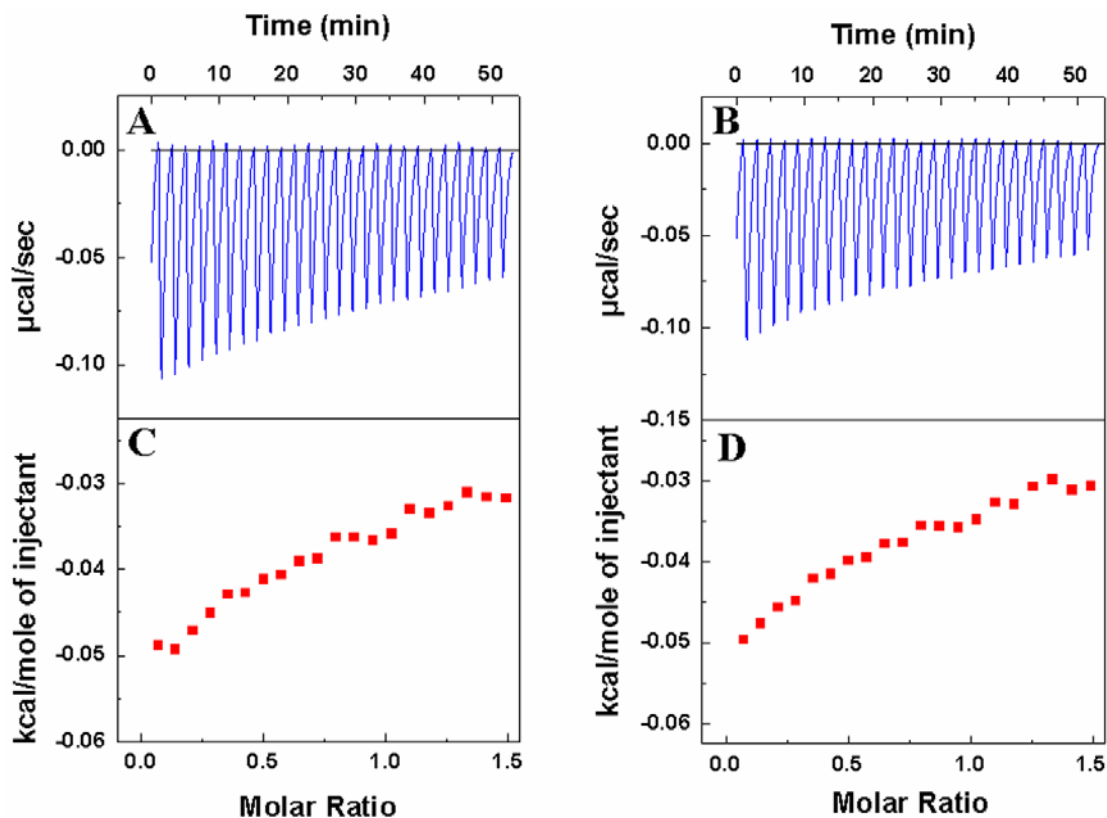

**S1.** (A & B) Isothermal titration calorimetric data recorded during successive injections of  $10 \mu\text{l}$  aqueous  $\text{CaCl}_2$  (A) and  $\text{MgCl}_2$  (B) solution ( $10^{-2}$  M) into the titration cell containing 1.47 ml of water. (C & D) Binding isotherms obtained by integration of the raw data shown in the A and B respectively plotted as a function of the metal ion molar concentration in solution.
